# Supplementary material for: The pure rotational spectrum of ScBr
Source: Royal Society of Chemistry journal article supplement (doi:10.1039/a907769c), 2000-01-01
Supplement: output.pdf [file output.pdf]

TABLE 1  
Measured Hyperfine Components of Sc<sup>79</sup>Br (MHz).

| $J'-J''$ | $I'-I''$ | $F'-F''$ | $v = 0$    |                  | $v = 1$    |                  |
|----------|----------|----------|------------|------------------|------------|------------------|
| 1-0      | 5-5      | 6-5      | 6207.8646  | 0.0 <sup>a</sup> |            |                  |
|          | 4-4      | 5-4      | 6211.3141  | 1.9              |            |                  |
|          | 5-5      | 5-5      | 6226.6323  | -1.1             |            |                  |
| 2-1      | 3-3      | 5-4      | 12419.6103 | 0.6              | 12367.6518 | 0.5 <sup>a</sup> |
|          | 2-2      | 2-2      | 12419.7074 | 0.1              |            |                  |
|          | 5-5      | 6-5      | 12420.7110 | 0.0              | 12369.0502 | 0.4              |
|          | 2-2      | 3-2      | 12420.8852 | -1.3             |            |                  |
|          | 5-5      | 5-5      | 12423.1964 | 1.9              | 12371.6096 | 2.2              |
|          | 3-3      | 2-2      | 12423.4482 | -1.0             |            |                  |
|          | 4-4      | 4-4      | 12423.6809 | -0.3             |            |                  |
|          | 5-5      | 7-6      | 12423.7889 | -0.1             | 12372.1562 | 0.4              |
|          | 4-4      | 5-4      | 12424.1428 | -0.8             | 12372.6127 | -0.8             |
|          | 4-4      | 6-5      | 12425.2268 | -1.3             | 12373.6262 | 0.6              |
|          | 5-5      | 3-4      | 12425.4539 | 1.6              | 12373.9359 | -0.3             |
|          | 3-4      | 4-3      | 12425.6435 | -1.6             | 12374.1421 | -2.5             |
|          | 2-2      | 4-3      | 12426.7468 | -0.7             | 12375.1420 | -0.2             |
|          | 4-4      | 5-5      | 12431.0992 | 1.7              |            |                  |
|          | 4-3      | 4-3      | 12432.0629 | -0.4             |            |                  |
|          | 3-3      | 4-4      | 12433.0153 | 5.6 <sup>b</sup> |            |                  |
|          | 4-2      | 3-3      | 12433.0435 | 1.9 <sup>b</sup> |            |                  |
|          | 5-3      | 5-4      | 12433.6452 | -0.4             |            |                  |
|          | 3-5      | 5-4      | 12436.2015 | 1.4              |            |                  |
|          | 5-5      | 4-4      | 12437.2037 | 0.6              |            |                  |
|          | 5-5      | 6-6      | 12439.4792 | -0.7             | 12388.1929 | 0.5              |
| 3-2      | 5-5      | 7-6      | 18635.9785 | -0.6             | 18558.5622 | 1.4              |
|          | 5-5      | 8-7      | 18637.6740 | 0.4              | 18560.2612 | -0.6             |
|          | 4-4      | 6-5      | 18638.0360 | -1.4             | 18560.6185 | -0.5             |
|          | 4-4      | 7-6      | 18638.4430 | 1.2              | 18561.0375 | -0.1             |
|          | 2-2      | 5-4      | 18638.7390 | 0.3              |            |                  |
|          | 3-3      | 6-5      | 18639.2695 | -0.3             | 18561.9651 | -0.2             |
|          | 5-3      | 5-4      | 18639.4763 | 0.7              |            |                  |

<sup>a</sup> Observed-Calculated residuals in kHz.

<sup>b</sup> Line excluded from final fit.

TABLE 2  
Measured Hyperfine Components of Sc<sup>81</sup>Br (MHz).

| $J'-J''$ | $I'-I''$ | $F'-F''$ | $v = 0$    | $v = 1$           |            |                   |
|----------|----------|----------|------------|-------------------|------------|-------------------|
| 1-0      | 5-5      | 6-5      | 6152.5747  | -1.9 <sup>a</sup> |            |                   |
| 2-1      | 2-2      | 2-2      | 12308.8060 | 0.7               |            |                   |
|          | 3-3      | 5-4      | 12309.5221 | 1.6               | 12258.3306 | -0.6 <sup>a</sup> |
|          | 5-5      | 6-5      | 12309.7646 | 0.6               | 12258.7957 | -0.0              |
|          | 2-2      | 3-2      | 12309.9014 | -0.7              |            |                   |
|          | 5-5      | 5-5      | 12311.9484 | 1.3               | 12261.0628 | -2.0              |
|          | 4-4      | 4-4      | 12312.1661 | -0.6              | 12261.3480 | -0.3              |
|          | 5-5      | 7-6      | 12312.7074 | -1.0              | 12261.7747 | -0.2              |
|          | 5-5      | 3-4      | 12313.9221 | 0.8               |            |                   |
|          | 4-4      | 6-5      | 12314.0138 | 0.3               | 12263.1191 | 1.5               |
|          | 3-4      | 4-3      | 12314.0868 | -1.0              | 12263.2824 | -3.5 <sup>b</sup> |
|          | 2-2      | 4-3      | 12315.5642 | -1.1              |            |                   |
|          | 4-4      | 5-5      | 12320.2946 | -0.6              |            |                   |
|          | 4-2      | 3-3      | 12320.9695 | -0.3              |            |                   |
|          | 4-3      | 4-3      | 12321.2040 | -0.1              |            |                   |
|          | 3-3      | 4-4      | 12322.0999 | 4.0 <sup>b</sup>  |            |                   |
| 3-2      | 3-5      | 5-4      | 12323.5476 | 1.5               |            |                   |
|          | 5-5      | 4-4      | 12324.8791 | 0.2               |            |                   |
|          | 5-5      | 6-6      | 12327.2884 | -0.3              | 12276.6098 | -0.1              |
|          | 5-5      | 7-6      | 18469.2840 | 0.2               | 18392.3972 | 0.8               |
|          | 5-5      | 8-7      | 18470.9238 | 0.2               | 18394.5517 | -0.1              |
|          | 4-4      | 6-5      | 18471.3057 | 1.0               | 18394.9246 | 0.9               |
|          | 4-4      | 7-6      | 18471.6371 | 0.8               | 18395.2826 | 1.0               |
|          | 2-2      | 5-4      | 18471.6830 | 5.0 <sup>b</sup>  | 18395.3917 | -1.9              |
|          | 3-3      | 6-5      | 18472.1819 | -2.5              | 18395.9010 | 1.1               |

<sup>a</sup> Observed-Calculated residuals in kHz.

<sup>b</sup> Line excluded from final fit.
